# Supplementary material
Source: PubMed Central journal article supplement (PMC3553383)
Supplement: emboj2012327s1.pdf [file emboj2012327s1.pdf]

## Supplementary Information

**Table S1.** *Saccharomyces cerevisiae* strains used in this study.

| Strain      | Relevant genotype                                                                                                            | Source or Reference      |
|-------------|------------------------------------------------------------------------------------------------------------------------------|--------------------------|
| W303        | <i>MATa ade2-1 can1-100 his3-11,15 leu2-3,112 trp1-1 ura3-1 rad5-535</i>                                                     |                          |
| YLL2479     | W303 <i>dnl4Δ::KANMX</i>                                                                                                     | This study               |
| YLL2920     | W303 <i>TBF1::LEU2</i>                                                                                                       | This study               |
| YLL3089     | W303 <i>tbfl-1::LEU2</i>                                                                                                     | This study               |
| YLL3098     | W303 <i>tbfl-2::LEU2</i>                                                                                                     | This study               |
| YLL3099     | W303 <i>tbfl-3::LEU2</i>                                                                                                     | This study               |
| YLL3158     | W303 <i>rsc2Δ::NATMX</i>                                                                                                     | This study               |
| YLL3163     | W303 <i>env11Δ::NATMX</i>                                                                                                    | This study               |
| YLL3167     | W303 <i>arp8Δ::NATMX</i>                                                                                                     | This study               |
| YLL3204     | W303 <i>swr1Δ::KANMX</i>                                                                                                     | This study               |
| YLL3206     | W303 <i>vid22Δ::TRP1 rsc2Δ::KANMX</i>                                                                                        | This study               |
| DMP4499     | W303 <i>rpd3Δ::HIS3</i>                                                                                                      | This study               |
| DMP5267     | W303 <i>vid22Δ::TRP1</i>                                                                                                     | This study               |
| DMP5321/2D  | W303 <i>tbfl-1::LEU2 rad51Δ::HIS3</i>                                                                                        | This study               |
| DMP5321/4C  | W303 <i>rad51Δ::HIS3</i>                                                                                                     | This study               |
| DMP5322/10D | W303 <i>tbfl-1::LEU2 rad52Δ::TRP1</i>                                                                                        | This study               |
| DMP5322/7C  | W303 <i>rad52Δ::TRP1</i>                                                                                                     | This study               |
| DMP5323     | W303 <i>vid22Δ::TRP1 rad51Δ::HIS3</i>                                                                                        | This study               |
| DMP5324     | W303 <i>vid22Δ::TRP1 rad52Δ::TRP1</i>                                                                                        | This study               |
| DMP5431     | W303 <i>tbfl-1::LEU2 rsc2Δ::NATMX</i>                                                                                        | This study               |
| DMP5433     | W303 <i>vid22Δ::TRP1 arp8Δ::NATMX</i>                                                                                        | This study               |
| DMP5434     | W303 <i>tbfl-1::LEU2 arp8Δ::NATMX</i>                                                                                        | This study               |
| DMP5492     | W303 <i>tbfl-1::LEU2 swr1Δ::KANMX</i>                                                                                        | This study               |
| DMP5493     | W303 <i>vid22Δ::TRP1 swr1Δ::KANMX</i>                                                                                        | This study               |
| esa1-1851   | W303 <i>esa1-1851::URA3</i>                                                                                                  | Bird <i>et al</i> , 2002 |
| DMP5518     | W303 <i>tbfl-1::LEU2 esa1-1851 ::URA3</i>                                                                                    | This study               |
| DMP5519     | W303 <i>tbfl-1::LEU2 rpd3Δ::HIS3</i>                                                                                         | This study               |
| DMP5587     | W303 <i>tbfl-1::LEU2 dnl4Δ::KANMX</i>                                                                                        | This study               |
| DMP5588     | W303 <i>vid22Δ::TRP1 dnl4Δ::KANMX</i>                                                                                        | This study               |
| DMP5589     | W303 <i>rad52Δ::TRP1 dnl4Δ::KANMX</i>                                                                                        | This study               |
| DMP5591     | W303 <i>tbfl-3::LEU2 rad51Δ::HIS3</i>                                                                                        | This study               |
| DMP5592     | W303 <i>tbfl-3::LEU2 rad52Δ::TRP1</i>                                                                                        | This study               |
| DMP5604     | W303 <i>tbfl-1::LEU2 rad52Δ::TRP1 dnl4Δ::KANMX</i>                                                                           | This study               |
| DMP5605     | W303 <i>vid22Δ::TRP1 rad52Δ::TRP1 dnl4Δ::KANMX</i>                                                                           | This study               |
| YMV45       | <i>ho hml::ADE1 mata::hisG hmr::ADE1 leu2::leu2(Asp718-Sall)-URA3-pBR332-MATa ade3::GAL::HO ade1 lys5 ura3-52 trp1::hisG</i> | Vaze <i>et al</i> , 2002 |

|         |                                                                                                                    |                              |
|---------|--------------------------------------------------------------------------------------------------------------------|------------------------------|
| YLL2760 | YMV45 <i>bar1Δ::HPHMX</i>                                                                                          | This study                   |
| YLL2958 | YMV45 <i>rad52Δ::NATMX bar1Δ::HPHMX</i>                                                                            | This study                   |
| YLL3090 | YMV45 <i>tbfl-1::LEU2 bar1Δ::HPHMX</i>                                                                             | This study                   |
| YLL3134 | YMV45 <i>exo1Δ::NATMX bar1Δ::HPHMX</i>                                                                             | This study                   |
| YLL3135 | YMV45 <i>tbfl-3::LEU2 exo1Δ::NATMX bar1Δ::HPHMX</i>                                                                | This study                   |
| YLL3168 | YMV45 <i>tbfl-1::LEU2 rad52Δ::NATMX bar1Δ::HPHMX</i>                                                               | This study                   |
| YLL3169 | YMV45 <i>tbfl-3::LEU2 rad52Δ::NATMX bar1Δ::HPHMX</i>                                                               | This study                   |
| YLL3170 | YMV45 <i>vid22Δ::TRP1 bar1Δ::HPHMX</i>                                                                             | This study                   |
| YLL3227 | YMV45 <i>MRE11-18MYC::TRP1 bar1Δ::HPHMX</i>                                                                        | This study                   |
| YLL3228 | YMV45 <i>tbfl-1::LEU2 MRE11-18MYC::TRP1 bar1Δ::HPHMX</i>                                                           | This study                   |
| YLL3237 | YMV45 <i>TBF1-18MYC::TRP1 bar1Δ::HPHMX</i>                                                                         | This study                   |
| YLL3238 | YMV45 <i>VID22-18MYC::TRP1 bar1Δ::HPHMX</i>                                                                        | This study                   |
| YLL3241 | YMV45 <i>vid22Δ::TRP1 rad52Δ::KANMX bar1Δ::HPHMX</i>                                                               | This study                   |
| YLL3253 | YMV45 <i>tbfl-3::LEU2 bar1Δ::HPHMX</i>                                                                             | This study                   |
| YLL3272 | YMV45 <i>DNL4-18MYC::TRP1 bar1Δ::HPHMX</i>                                                                         | This study                   |
| YLL3273 | YMV45 <i>tbfl-1::LEU2 DNL4-18MYC::TRP1 bar1Δ::HPHMX</i>                                                            | This study                   |
| YLL3274 | YMV45 <i>vid22Δ::KANMX DNL4-18MYC::TRP1 bar1Δ::HPHMX</i>                                                           | This study                   |
| JKM139  | <i>MATa hmlΔ hmrΔ ade1 lys5 leu2-3,112 trp1::hisG ura3-52 ho ade3::GAL-HO site</i>                                 | Lee <i>et al</i> , 1998      |
| YLL2285 | JKM139 <i>dnl4Δ::KANMX</i>                                                                                         | This study                   |
| YLL3152 | JKM139 <i>vid22Δ::TRP1</i>                                                                                         | This study                   |
| YLL3153 | JKM139 <i>tbfl-1::LEU2</i>                                                                                         | This study                   |
| YLL3195 | JKM139 <i>VID22-18MYC::URA3</i>                                                                                    | This study                   |
| YLL3196 | JKM139 <i>tbfl-1::LEU2 VID22-18MYC::URA3</i>                                                                       | This study                   |
| YLL3254 | JKM139 <i>mre11Δ::KANMX TBF1-18MYC::HIS3</i>                                                                       | This study                   |
| YLL3255 | JKM139 <i>mre11Δ::KANMX VID22-18MYC::URA3</i>                                                                      | This study                   |
| YLL3262 | JKM139 <i>tbfl-3::LEU2</i>                                                                                         | This study                   |
| DMP5466 | JKM139 <i>TBF1-18MYC::HIS3</i>                                                                                     | This study                   |
| DMP5497 | JKM139 <i>vid22Δ::TRP1 TBF1-18MYC::HIS3</i>                                                                        | This study                   |
| DMP5499 | JKM139 <i>hta2Δ::NATMX hta1-S129A::URA3 TBF1-18MYC::HIS3</i>                                                       | This study                   |
| tGI354  | <i>ho hmlΔ::ADE1 MATa-inc hmrΔ::ADE1 ade1 leu2-3;112 lys5 trp1::hisG ura3-52 ade3::GAL::HO arg5,6::MATa::HPHMX</i> | Saponaro <i>et al</i> , 2010 |
| YLL3088 | tGI354 <i>tbfl-1::LEU2</i>                                                                                         | This study                   |
| YLL3092 | tGI354 <i>vid22Δ::TRP1</i>                                                                                         | This study                   |

## References

- Bird AW, Yu DY, Pray-Grant MG, Qiu Q, Harmon KE, Megee PC, Grant PA, Smith MM, Christman MF (2002) Acetylation of histone H4 by Esa1 is required for DNA double-strand break repair. *Nature* **419**: 411-415.
- Lee SE, Moore JK, Holmes A, Umezu K, Kolodner RD, Haber JE (1998) *Saccharomyces* Ku70, mre11/rad50 and RPA proteins regulate adaptation to G2/M arrest after DNA damage. *Cell* **94**: 399-409.

- Saponaro M, Callahan D, Zheng X, Krejci L, Haber JE, Klein HL, Liberi G (2010) Cdk1 targets Srs2 to complete synthesis-dependent strand annealing and to promote recombinational repair. *PLoS Genet* **6**: e1000858.
- Vaze MB, Pellicioli A, Lee SE, Ira G, Liberi G, Arbel-Eden A, Foiani M, Haber JE (2002) Recovery from checkpoint-mediated arrest after repair of a double-strand break requires Srs2 helicase. *Mol Cell* **10**: 373-385.

**Figure S1**

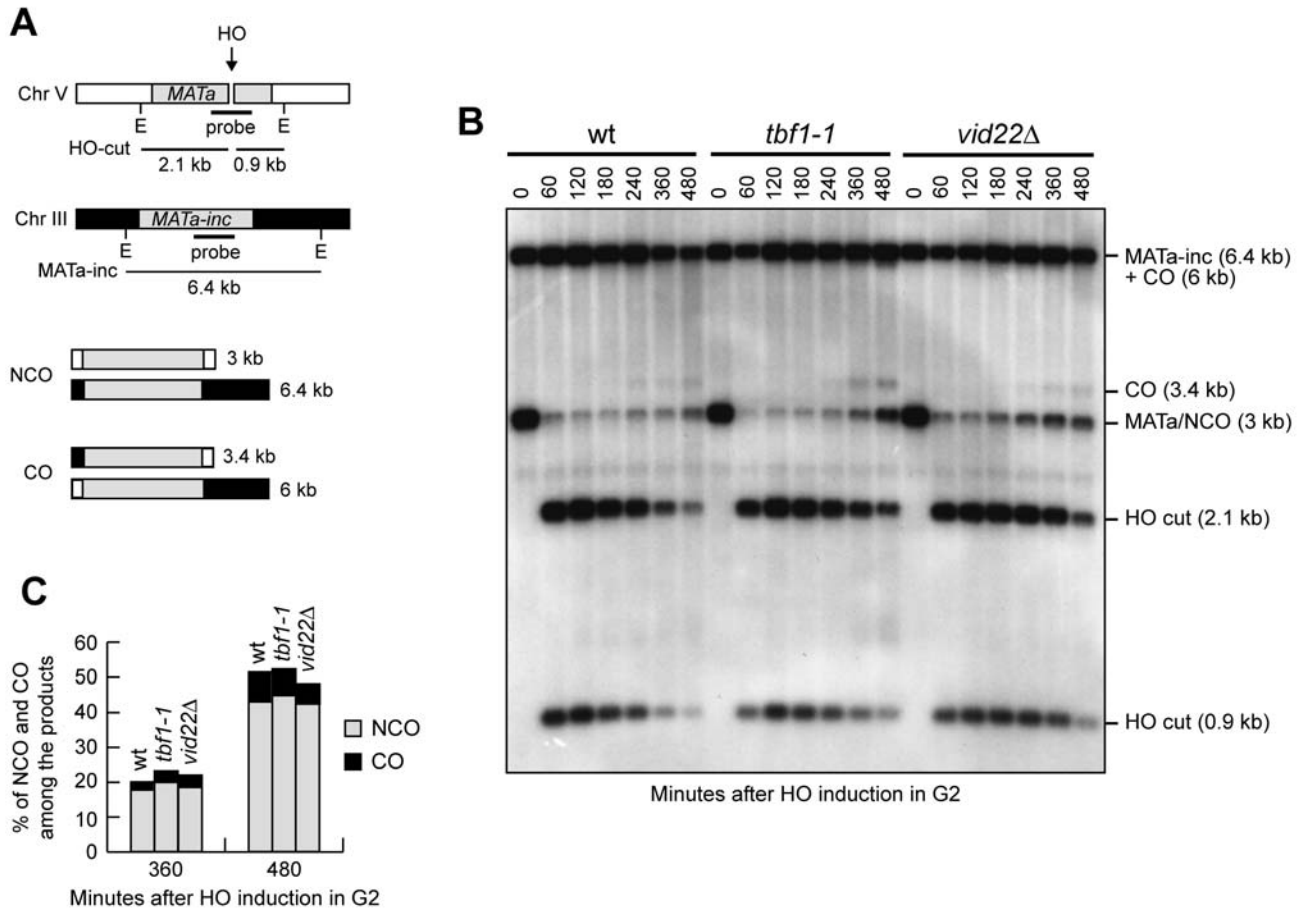

**Figure S1** Analysis of crossover and non-crossover frequency during ectopic recombination in *tbf1* and *vid22Δ* mutants. **(A)** Schematic representation of the ectopic recombination assay. Galactose-induced HO generates a DSB at a *MATa* DNA sequence inserted on chromosome V, while the homologous *MATa-inc* region on chromosome III cannot be cut by HO and is used as a donor for HR-mediated repair, which can generate both noncrossover (NCO) and crossover (CO) products. The sizes of EcoRI (E) fragments detected by the depicted probe are indicated. **(B-C)** Exponentially growing YEPR (exp) cell cultures were arrested in G2 with nocodazole (time zero) and transferred to YEPRG in the presence of nocodazole. **(B)** Southern blot analysis of EcoRI-digested genomic DNA with the *MATa* probe depicted in **(A)**. **(C)** Densitometric analysis of CO versus NCO repair bands at the indicated time points from break induction. To determine the amount of non-crossover and crossover products, the normalized intensity of the corresponding bands at different time points after DSB formation was divided by the normalized intensity of the uncut *MATa* band at time zero before HO induction (100%). The repair efficiency (NCO+CO) was normalized with respect to the efficiency of DSB formation by subtracting the value calculated 2 hours after HO induction (maximum efficiency of DSB formation) from the values calculated at the subsequent time points after galactose addition.
